# Supplementary material for: Fundus Camera-Delivered Light-Induced Retinal Degeneration in Mice With the RPE65 Leu450Met Variant is Associated With Oxidative Stress and Apoptosis
Source: PubMed Central journal article supplement — Invest Ophthalmol Vis Sci. 2016 Oct;57(13):5558–67. doi: 10.1167/iovs.16-19965 (PMC5080935; doi:10.1167/iovs.16-19965), 2016-10
Supplement: iovs-57-11-64_s01.pdf [file iovs-57-11-64_s01.pdf]

## Supplementary Tables and Figure

Supplementary Table 1. List of antibodies and concentrations used for the different immunostaining experiments

| Experiment        | Primary Antibodies    |                           |          | Secondary Antibodies |                          |          |
|-------------------|-----------------------|---------------------------|----------|----------------------|--------------------------|----------|
|                   | Name<br>Host          | Source<br>(Catalog #)     | Dilution | Wavelength<br>Host   | Source<br>(Catalog)      | Dilution |
| IHC               | anti-mC3d<br>Goat     | R&D Systems<br>(AF2655)   | 1:50     | AF 594<br>Donkey     | Invitrogen<br>(A-211058) | 1:200    |
|                   | anti-HO-1<br>Rabbit   | Enzo<br>(ADI-OSA-150)     | 1:100    | AF 594<br>Donkey     | Invitrogen<br>(A-21207)  | 1:200    |
| RPE<br>Flat Mount | anti-CD16/CD32<br>Rat | BD-Pharmingen<br>(553142) | 1:25     | AF488<br>Donkey      | Invitrogen<br>(A-21208)  | 1:200    |
|                   | anti-Iba1<br>Rabbit   | Wako, Inc<br>(019-19741)  | 1:500    | AF 594<br>Donkey     | Invitrogen<br>(A-21207)  | 1:200    |

Supplementary Table 2. Primers for qPCR

| Gene          | Refseq #        | Forward                    | Reverse                    | Length | Tm |
|---------------|-----------------|----------------------------|----------------------------|--------|----|
| <b>Gapdh</b>  | NM_008084<br>.2 | TGTGTCCGTCGTGGATCTG<br>A   | CCTGCTTCACCACCTTCTT<br>GA  | 77     | 60 |
| <b>Nfe2l2</b> | NM_010902       | CTTGCTCTTGGGAACAAGG<br>AAC | CGACAGAAACCTCCATCTT<br>CTG | 157    | 62 |
| <b>Stat3</b>  | NM_011486       | CCACTGCACTGAAAGGCTA<br>A   | ATAGTGAGCCCCTGGA<br>ACTG   | 98     | 59 |
| <b>Lpo</b>    | NM_080420       | TCTATCAGGAAGCAAGGAA        | GTAGGATGGGTAGGTAGTC        | 75     | 59 |
| <b>HO-1</b>   | NM_010442       | TCAGGTGTCCAGAGAAGGC<br>TTT | CTCTCCAGGGCCGTGTAG<br>A    | 70     | 62 |
| <b>Srxn1</b>  | NM_029688       | ATGGAGCTGGGAAAACAGA<br>G   | TAATGAGGTGGGCATTCAG<br>A   | 134    | 60 |
| <b>Hspa1a</b> | NM_010479       | TTTGTCTGCAATCAAGTCC<br>T   | GGCTGTCCTGCAAAACAAA<br>T   | 191    | 60 |
| <b>Ptgs2</b>  | NM_011198       | AAGACTTGCCAGGCTGAAC<br>T   | CTTCTGCAGTCCAGGTTCA<br>A   | 98     | 59 |

Supplementary Table 3. Expression change of genes 4 h after light exposure

| 4h after FCD-LIRD | Fold change | p-value  |
|-------------------|-------------|----------|
| Nfe2l2            | 1.06        | 0.63     |
| Srxn1             | 1.72        | 2.80E-04 |
| Stat3             | 1.89        | 0.012    |
| Ptgs2             | 2.02        | 0.015    |
| Hspa1a            | 2.19        | 0.027    |
| Lpo               | 2.45        | 9.30E-03 |
| HO-1              | 5.69        | 5.50E-06 |

Supplementary Table 4. Expression change of genes 24 h after light exposure

| 24h after FCD-LIRD | Fold change | p-value  |
|--------------------|-------------|----------|
| Nfe2l2             | 1.03        | 0.79     |
| Srxn1              | 1.33        | 0.022    |
| Stat3              | 1.96        | 0.011    |
| Ptgs2              | 0.81        | 0.51     |
| Hspa1a             | 1.27        | 0.087    |
| Lpo                | 1.61        | 0.15     |
| HO-1               | 3.07        | 2.30E-05 |

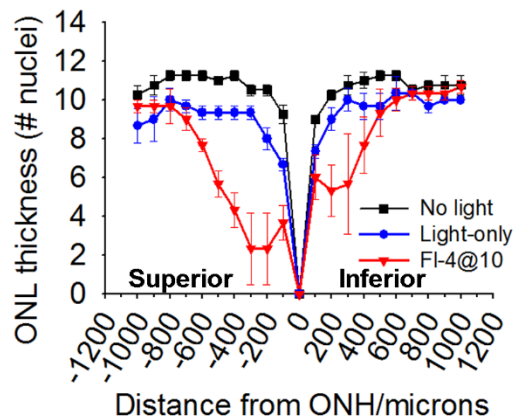

Figure S1. Outer nuclear layer (ONL) thickness, measured on histology sections as the number of ONL nuclei at 100µm intervals, in eyes without treatment (n=4), 21 days after “Light-only” FCD-LIRD (n=3), and 21 days after FI-4@10 light (n=3).
